# Supplementary material
Source: ML conference proceedings conference paper supplement (https://proceedings.mlr.press/v97/lu19b.html)
Supplement: Supplementary file [file lu19b-supp.pdf]

---

# Supplementary Materials for Neurally-Guided Structure Inference

---

Sidi Lu <sup>\*1</sup> Jiayuan Mao <sup>\*23</sup> Joshua B. Tenenbaum <sup>245</sup> Jiajun Wu <sup>2</sup>

## A. CNN Architecture of the Neural Guider for Matrix Decomposition

Table 1 shows the architecture of our CNN-based neural guider for probabilistic matrix decomposition.

|                                                                     |
|---------------------------------------------------------------------|
| Padding, output shape = $[200 \times 200 \times 2]$                 |
| $3 \times 3$ Conv, with stride = 1, channels = 64, ReLU activation  |
| $4 \times 4$ Conv, with stride = 2, channels = 64, ReLU activation  |
| $4 \times 4$ Conv, with stride = 2, channels = 128, ReLU activation |
| Instance normalization                                              |
| $4 \times 4$ Conv, with stride = 2, channels = 128, ReLU activation |
| $4 \times 4$ Conv, with stride = 2, channels = 128, ReLU activation |
| $3 \times 3$ Conv, with stride = 1, channels = 128, ReLU activation |
| Instance normalization                                              |
| $4 \times 4$ Conv, with stride = 2, channels = 256, ReLU activation |
| $4 \times 4$ Conv, with stride = 2, channels = 512, ReLU activation |
| $3 \times 3$ Conv, with stride = 1, channels = 512, ReLU activation |
| Flatten                                                             |
| Fully connected + softmax                                           |

Table 1. Network architecture of the CNN-based neural guider.

---

<sup>\*</sup>Equal contribution <sup>1</sup>Shanghai Jiao Tong University, <sup>2</sup>MIT CSAIL, <sup>3</sup>IIS, Tsinghua University, <sup>4</sup>Department of Brain and Cognitive Sciences, MIT, <sup>5</sup>Center for Brains, Minds and Machines (CBMM), MIT. Correspondence to: Sidi Lu <steve\_lu@apex.sjtu.edu.cn>, Jiajun Wu <jiajunwu@mit.edu>.
